# Supplementary material
Source: publisher figshare collection journal article supplement (https://gsajournals.figshare.com/articles/dataset/_/12119022)
Supplement: Supplementary file 1 [file 1]

**Table S1: Seed count for both male and females of different ages for the lines used**

| Age  | CTL1.2 | CTL1.18 | CTL2.4 | COL3-4/20 | 3158 | CTL4.7 | 3162 | CTL5.17 |
|------|--------|---------|--------|-----------|------|--------|------|---------|
| 40 ♂ | 1548   | 1844    | 884    | 1803      | 2369 | 910    | 2049 | 1912    |
| 40 ♀ | 1765   | 2205    | 1490   | 1797      | 4076 | 1966   | 3362 | 1163    |
| 45 ♂ | 1586   | 2019    | 1791   | 3223      | 3224 | 2282   | 3248 | 1729    |
| 45 ♀ | 2417   | 2630    | 1363   | 4536      | 5028 | 2409   | 5076 | 3054    |
| 50 ♂ | 1115   | 1243    | 1181   | 2783      | 2707 | 1306   | 2335 | 1330    |
| 50 ♀ | 865    | 991     | 1738   | 2676      | 3129 | 1442   | 2347 | 1353    |
| 55 ♂ | 1425   | 1072    | 486    | 2290      | 3565 | 977    | 2764 | 1027    |
| 55 ♀ | 2550   | 1880    | 918    | 3533      | 5057 | 2694   | 4203 | 1109    |

**Table S1:** The total seed counts for each sex, age and line, based on the pooling of data provided in Tables S2-S9

**Table S2: Seed count of four different category in each replicate for line Col3-4/20**

|                       |            |            |             |            |            |            |            |            |            |
|-----------------------|------------|------------|-------------|------------|------------|------------|------------|------------|------------|
| <b>COL3-4/20 40 ♂</b> | R1         | R2         | R3          | R4         | R5         | R6         | R7         | R8         | R9         |
| Red                   | 18         | 22         | 31          | 53         | 31         | 56         |            |            |            |
| Green                 | 23         | 18         | 35          | 51         | 22         | 65         |            |            |            |
| Both                  | 55         | 65         | 113         | 133        | 85         | 216        |            |            |            |
| None                  | 80         | 88         | 124         | 141        | 104        | 174        |            |            |            |
| <b>Total</b>          | <b>176</b> | <b>193</b> | <b>303</b>  | <b>378</b> | <b>242</b> | <b>511</b> |            |            |            |
| <b>COL3-4/20 40 ♀</b> | R1         | R2         | R3          | R4         | R5         | R6         | R7         | R8         | R9         |
| Red                   | 9          | 25         | 10          | 8          | 14         | 31         |            |            |            |
| Green                 | 9          | 19         | 22          | 12         | 10         | 26         |            |            |            |
| Both                  | 105        | 243        | 148         | 129        | 126        | 213        |            |            |            |
| None                  | 100        | 224        | 140         | 119        | 118        | 205        |            |            |            |
| <b>Total</b>          | <b>223</b> | <b>511</b> | <b>320</b>  | <b>268</b> | <b>268</b> | <b>475</b> |            |            |            |
| <b>COL3-4/20 45 ♂</b> | R1         | R2         | R3          | R4         | R5         | R6         | R7         | R8         | R9         |
| Red                   | 46         | 36         | 14          | 34         | 46         | 68         | 15         | 90         | 30         |
| Green                 | 55         | 45         | 17          | 38         | 39         | 74         | 20         | 93         | 37         |
| Both                  | 168        | 151        | 65          | 86         | 105        | 169        | 49         | 262        | 98         |
| None                  | 162        | 164        | 54          | 99         | 124        | 200        | 54         | 313        | 103        |
| <b>Total</b>          | <b>431</b> | <b>396</b> | <b>150</b>  | <b>257</b> | <b>314</b> | <b>511</b> | <b>138</b> | <b>758</b> | <b>268</b> |
| <b>COL3-4/20 45 ♀</b> | R1         | R2         | R3          | R4         | R5         | R6         | R7         | R8         | R9         |
| Red                   | 29         | 24         | 14          | 25         | 18         | 4          | 31         | 38         | 16         |
| Green                 | 25         | 35         | 9           | 27         | 21         | 6          | 27         | 42         | 18         |
| Both                  | 288        | 324        | 130         | 290        | 292        | 55         | 254        | 292        | 160        |
| None                  | 270        | 319        | 134         | 280        | 259        | 57         | 253        | 309        | 161        |
| <b>Total</b>          | <b>612</b> | <b>702</b> | <b>287</b>  | <b>622</b> | <b>590</b> | <b>122</b> | <b>565</b> | <b>681</b> | <b>355</b> |
| <b>COL3-4/20 50 ♂</b> | R1         | R2         | R3          | R4         | R5         | R6         | R7         | R8         | R9         |
| Red                   | 31         | 73         | 137         | 30         | 53         | 20         |            |            |            |
| Green                 | 24         | 64         | 173         | 30         | 42         | 27         |            |            |            |
| Both                  | 77         | 205        | 375         | 107        | 105        | 72         |            |            |            |
| None                  | 79         | 267        | 455         | 123        | 134        | 80         |            |            |            |
| <b>Total</b>          | <b>211</b> | <b>609</b> | <b>1140</b> | <b>290</b> | <b>334</b> | <b>199</b> |            |            |            |
| <b>COL3-4/20 50 ♀</b> | R1         | R2         | R3          | R4         | R5         | R6         | R7         | R8         | R9         |

|                       |            |            |            |            |            |            |            |            |            |
|-----------------------|------------|------------|------------|------------|------------|------------|------------|------------|------------|
| Red                   | 32         | 16         | 18         | 19         | 21         | 16         |            |            |            |
| Green                 | 31         | 12         | 20         | 25         | 19         | 14         |            |            |            |
| Both                  | 317        | 160        | 243        | 176        | 181        | 135        |            |            |            |
| None                  | 278        | 190        | 241        | 181        | 185        | 146        |            |            |            |
| <b>Total</b>          | <b>658</b> | <b>378</b> | <b>522</b> | <b>401</b> | <b>406</b> | <b>311</b> |            |            |            |
| <b>COL3-4/20 55 ♂</b> | R1         | R2         | R3         | R4         | R5         | R6         | R7         | R8         | R9         |
| Red                   | 14         | 19         | 16         | 29         | 34         | 80         | 69         | 19         | 18         |
| Green                 | 16         | 23         | 19         | 22         | 40         | 62         | 61         | 15         | 20         |
| Both                  | 53         | 47         | 65         | 82         | 78         | 184        | 142        | 89         | 90         |
| None                  | 65         | 49         | 85         | 85         | 79         | 185        | 141        | 106        | 89         |
| <b>Total</b>          | <b>148</b> | <b>138</b> | <b>185</b> | <b>218</b> | <b>231</b> | <b>511</b> | <b>413</b> | <b>229</b> | <b>217</b> |
| <b>COL3-4/20 55 ♀</b> | R1         | R2         | R3         | R4         | R5         | R6         | R7         | R8         | R9         |
| Red                   | 6          | 28         | 32         | 8          | 26         | 9          | 12         | 12         | 14         |
| Green                 | 5          | 20         | 19         | 14         | 31         | 12         | 13         | 21         | 15         |
| Both                  | 86         | 236        | 200        | 107        | 298        | 121        | 159        | 362        | 162        |
| None                  | 94         | 216        | 193        | 119        | 313        | 119        | 156        | 132        | 158        |
| <b>Total</b>          | <b>191</b> | <b>500</b> | <b>444</b> | <b>248</b> | <b>668</b> | <b>261</b> | <b>340</b> | <b>527</b> | <b>354</b> |

**Table S3: Seed count of four different category in each replicate for line 3158**

|                  |            |            |            |             |            |            |            |            |            |
|------------------|------------|------------|------------|-------------|------------|------------|------------|------------|------------|
| <b>3158 40 ♂</b> | R1         | R2         | R3         | R4          | R5         | R6         | R7         | R8         | R9         |
| Red              | 38         | 37         | 44         | 46          | 51         | 137        |            |            |            |
| Green            | 20         | 37         | 36         | 32          | 47         | 130        |            |            |            |
| Both             | 72         | 103        | 106        | 81          | 123        | 319        |            |            |            |
| None             | 100        | 104        | 125        | 105         | 142        | 299        |            |            |            |
| <b>Total</b>     | <b>230</b> | <b>281</b> | <b>311</b> | <b>264</b>  | <b>363</b> | <b>885</b> |            |            |            |
| <b>3158 40 ♀</b> | R1         | R2         | R3         | R4          | R5         | R6         | R7         | R8         | R9         |
| Red              | 35         | 32         | 51         | 19          | 71         | 44         |            |            |            |
| Green            | 23         | 27         | 41         | 28          | 73         | 48         |            |            |            |
| Both             | 280        | 276        | 248        | 221         | 446        | 357        |            |            |            |
| None             | 242        | 284        | 257        | 236         | 405        | 332        |            |            |            |
| <b>Total</b>     | <b>580</b> | <b>619</b> | <b>597</b> | <b>504</b>  | <b>995</b> | <b>781</b> |            |            |            |
| <b>3158 45 ♂</b> | R1         | R2         | R3         | R4          | R5         | R6         | R7         | R8         | R9         |
| Red              | 104        | 33         | 12         | 9           | 44         | 58         | 12         | 73         | 36         |
| Green            | 123        | 38         | 12         | 10          | 50         | 49         | 14         | 74         | 46         |
| Both             | 338        | 104        | 49         | 32          | 144        | 165        | 43         | 214        | 96         |
| None             | 352        | 101        | 38         | 32          | 148        | 180        | 34         | 198        | 116        |
| <b>Total</b>     | <b>919</b> | <b>278</b> | <b>111</b> | <b>83</b>   | <b>386</b> | <b>452</b> | <b>103</b> | <b>559</b> | <b>294</b> |
| <b>3158 45 ♀</b> | R1         | R2         | R3         | R4          | R5         | R6         | R7         | R8         | R9         |
| Red              | 26         | 46         | 8          | 83          | 49         | 13         | 12         | 30         | 7          |
| Green            | 34         | 32         | 9          | 72          | 59         | 14         | 25         | 41         | 8          |
| Both             | 224        | 352        | 94         | 515         | 379        | 123        | 199        | 281        | 73         |
| None             | 216        | 354        | 102        | 545         | 371        | 126        | 153        | 294        | 59         |
| <b>Total</b>     | <b>500</b> | <b>784</b> | <b>213</b> | <b>1215</b> | <b>858</b> | <b>276</b> | <b>389</b> | <b>646</b> | <b>147</b> |
| <b>3158 50 ♂</b> | R1         | R2         | R3         | R4          | R5         | R6         | R7         | R8         | R9         |
| Red              | 28         | 33         | 141        | 38          | 77         | 31         |            |            |            |
| Green            | 45         | 25         | 136        | 38          | 61         | 32         |            |            |            |
| Both             | 105        | 79         | 402        | 111         | 188        | 85         |            |            |            |
| None             | 109        | 116        | 421        | 107         | 202        | 97         |            |            |            |

|                  |            |             |             |            |            |             |            |            |            |
|------------------|------------|-------------|-------------|------------|------------|-------------|------------|------------|------------|
| <b>Total</b>     | <b>287</b> | <b>253</b>  | <b>1100</b> | <b>294</b> | <b>528</b> | <b>245</b>  |            |            |            |
| <b>3158 50 ♀</b> | R1         | R2          | R3          | R4         | R5         | R6          | R7         | R8         | R9         |
| Red              | 34         | 12          | 33          | 26         | 22         | 35          |            |            |            |
| Green            | 27         | 04          | 42          | 41         | 20         | 17          |            |            |            |
| Both             | 296        | 60          | 319         | 360        | 133        | 206         |            |            |            |
| None             | 313        | 75          | 315         | 383        | 151        | 205         |            |            |            |
| <b>Total</b>     | <b>670</b> | <b>157</b>  | <b>709</b>  | <b>810</b> | <b>326</b> | <b>463</b>  |            |            |            |
| <b>3158 55 ♂</b> | R1         | R2          | R3          | R4         | R5         | R6          | R7         | R8         | R9         |
| Red              | 19         | 80          | 55          | 91         | 30         | 38          | 66         | 60         | 10         |
| Green            | 28         | 82          | 41          | 87         | 29         | 46          | 75         | 47         | 19         |
| Both             | 43         | 185         | 129         | 264        | 106        | 128         | 235        | 167        | 55         |
| None             | 39         | 227         | 120         | 270        | 102        | 140         | 219        | 191        | 46         |
| <b>Total</b>     | <b>129</b> | <b>574</b>  | <b>345</b>  | <b>712</b> | <b>267</b> | <b>352</b>  | <b>595</b> | <b>465</b> | <b>130</b> |
| <b>3158 55 ♀</b> | R1         | R2          | R3          | R4         | R5         | R6          | R7         | R8         | R9         |
| Red              | 14         | 78          | 81          | 13         | 16         | 71          | 4          | 11         | 39         |
| Green            | 18         | 59          | 80          | 11         | 10         | 52          | 6          | 12         | 34         |
| Both             | 153        | 492         | 469         | 116        | 155        | 434         | 77         | 100        | 234        |
| None             | 138        | 438         | 467         | 136        | 148        | 452         | 80         | 101        | 258        |
| <b>Total</b>     | <b>323</b> | <b>1067</b> | <b>1097</b> | <b>276</b> | <b>329</b> | <b>1009</b> | <b>167</b> | <b>224</b> | <b>565</b> |

**Table S4: Seed count of four different category in each replicate for line 3162**

|                  |            |            |            |            |            |            |            |            |            |
|------------------|------------|------------|------------|------------|------------|------------|------------|------------|------------|
| <b>3162 40 ♂</b> | R1         | R2         | R3         | R4         | R5         | R6         | R7         | R8         | R9         |
| Red              | 18         | 17         | 38         | 40         | 21         | 48         |            |            |            |
| Green            | 17         | 30         | 37         | 44         | 22         | 66         |            |            |            |
| Both             | 87         | 74         | 156        | 146        | 103        | 234        |            |            |            |
| None             | 114        | 89         | 178        | 133        | 116        | 221        |            |            |            |
| <b>Total</b>     | <b>236</b> | <b>210</b> | <b>409</b> | <b>363</b> | <b>262</b> |            |            |            |            |
| <b>3162 40 ♀</b> | R1         | R2         | R3         | R4         | R5         | R6         | R7         | R8         | R9         |
| Red              | 41         | 48         | 41         | 28         | 70         | 58         |            |            |            |
| Green            | 32         | 52         | 44         | 29         | 70         | 54         |            |            |            |
| Both             | 233        | 207        | 198        | 158        | 343        | 304        |            |            |            |
| None             | 197        | 200        | 212        | 118        | 342        | 283        |            |            |            |
| <b>Total</b>     | <b>503</b> | <b>507</b> | <b>495</b> | <b>333</b> | <b>825</b> | <b>699</b> |            |            |            |
| <b>3162 45 ♂</b> | R1         | R2         | R3         | R4         | R5         | R6         | R7         | R8         | R9         |
| Red              | 29         | 40         | 19         | 29         | 31         | 25         | 73         | 47         | 33         |
| Green            | 27         | 30         | 27         | 24         | 31         | 32         | 61         | 51         | 39         |
| Both             | 106        | 146        | 83         | 94         | 106        | 115        | 233        | 202        | 135        |
| None             | 123        | 172        | 105        | 129        | 127        | 112        | 237        | 228        | 147        |
| <b>Total</b>     | <b>285</b> | <b>388</b> | <b>234</b> | <b>276</b> | <b>295</b> | <b>284</b> | <b>604</b> | <b>528</b> | <b>354</b> |
| <b>3162 45 ♀</b> | R1         | R2         | R3         | R4         | R5         | R6         | R7         | R8         | R9         |
| Red              | 64         | 67         | 19         | 60         | 65         | 16         | 39         | 51         | 8          |
| Green            | 67         | 34         | 20         | 58         | 73         | 18         | 33         | 56         | 12         |
| Both             | 350        | 284        | 106        | 399        | 408        | 93         | 238        | 288        | 66         |
| None             | 317        | 284        | 96         | 383        | 347        | 108        | 195        | 292        | 62         |
| <b>Total</b>     | <b>798</b> | <b>669</b> | <b>241</b> | <b>900</b> | <b>893</b> | <b>235</b> | <b>505</b> | <b>687</b> | <b>148</b> |
| <b>3162 50 ♂</b> | R1         | R2         | R3         | R4         | R5         | R6         | R7         | R8         | R9         |
| Red              | 17         | 35         | 70         | 35         | 42         | 39         |            |            |            |
| Green            | 25         | 37         | 51         | 34         | 39         | 33         |            |            |            |

|                  |            |             |            |            |            |            |            |            |            |
|------------------|------------|-------------|------------|------------|------------|------------|------------|------------|------------|
| Both             | 89         | 120         | 200        | 155        | 153        | 179        |            |            |            |
| None             | 88         | 159         | 208        | 170        | 169        | 188        |            |            |            |
| <b>Total</b>     | <b>219</b> | <b>351</b>  | <b>529</b> | <b>394</b> | <b>403</b> | <b>439</b> |            |            |            |
| <b>3162 50 ♀</b> | R1         | R2          | R3         | R4         | R5         | R6         | R7         | R8         | R9         |
| Red              | 30         | 17          | 48         | 15         | 21         | 30         |            |            |            |
| Green            | 30         | 11          | 48         | 13         | 24         | 28         |            |            |            |
| Both             | 165        | 104         | 292        | 103        | 178        | 186        |            |            |            |
| None             | 143        | 126         | 281        | 116        | 167        | 171        |            |            |            |
| <b>Total</b>     | <b>368</b> | <b>258</b>  | <b>669</b> | <b>247</b> | <b>390</b> | <b>415</b> |            |            |            |
| <b>3162 55 ♂</b> | R1         | R2          | R3         | R4         | R5         | R6         | R7         | R8         | R9         |
| Red              | 56         | 17          | 26         | 15         | 60         | 23         | 20         | 26         | 14         |
| Green            | 67         | 14          | 20         | 5          | 67         | 26         | 17         | 28         | 16         |
| Both             | 209        | 82          | 83         | 63         | 191        | 95         | 95         | 135        | 65         |
| None             | 248        | 113         | 105        | 86         | 234        | 88         | 129        | 163        | 63         |
| <b>Total</b>     | <b>580</b> | <b>226</b>  | <b>234</b> | <b>169</b> | <b>552</b> | <b>232</b> | <b>261</b> | <b>352</b> | <b>158</b> |
| <b>3162 55 ♀</b> | R1         | R2          | R3         | R4         | R5         | R6         | R7         | R8         | R9         |
| Red              | 17         | 117         | 20         | 29         | 51         | 59         | 14         | 23         | 41         |
| Green            | 9          | 111         | 16         | 42         | 21         | 58         | 9          | 19         | 43         |
| Both             | 76         | 553         | 95         | 269        | 115        | 194        | 83         | 137        | 282        |
| None             | 73         | 506         | 112        | 262        | 155        | 138        | 76         | 123        | 232        |
| <b>Total</b>     | <b>175</b> | <b>1287</b> | <b>243</b> | <b>602</b> | <b>342</b> | <b>449</b> | <b>182</b> | <b>302</b> | <b>598</b> |

**Table S5: Seed count of four different category in each replicate for line CTL1.2**

|                    |             |            |            |
|--------------------|-------------|------------|------------|
| <b>CTL1.2 40 ♂</b> | R1          | R2         | R3         |
| Red                | 77          | 83         | 73         |
| Green              | 87          | 66         | 83         |
| Both               | 184         | 137        | 181        |
| None               | 137         | 187        | 253        |
| <b>Total</b>       | <b>485</b>  | <b>473</b> | <b>590</b> |
| <b>CTL1.2 40 ♀</b> | R1          | R2         | R3         |
| Red                | 137         | 69         | 41         |
| Green              | 154         | 74         | 51         |
| Both               | 321         | 149        | 121        |
| None               | 318         | 177        | 153        |
| <b>Total</b>       | <b>930</b>  | <b>469</b> | <b>366</b> |
| <b>CTL1.2 45 ♂</b> | R1          | R2         | R3         |
| Red                | 142         | 129        | 40         |
| Green              | 140         | 132        | 25         |
| Both               | 228         | 215        | 50         |
| None               | 211         | 214        | 60         |
| <b>Total</b>       | <b>721</b>  | <b>690</b> | <b>175</b> |
| <b>CTL1.2 45 ♀</b> | R1          | R2         | R3         |
| Red                | 166         | 101        | 85         |
| Green              | 164         | 94         | 75         |
| Both               | 408         | 244        | 240        |
| None               | 399         | 235        | 206        |
| <b>Total</b>       | <b>1137</b> | <b>674</b> | <b>606</b> |
| <b>CTL1.2 50 ♂</b> | R1          | R2         | R3         |

|                    |             |            |            |
|--------------------|-------------|------------|------------|
| Red                | 68          | 46         | 63         |
| Green              | 58          | 48         | 57         |
| Both               | 109         | 88         | 145        |
| None               | 128         | 138        | 167        |
| <b>Total</b>       | <b>363</b>  | <b>320</b> | <b>432</b> |
| <b>CTL1.2 50 ♀</b> | R1          | R2         | R3         |
| Red                | 35          | 39         | 38         |
| Green              | 30          | 34         | 44         |
| Both               | 83          | 56         | 124        |
| None               | 110         | 157        | 115        |
| <b>Total</b>       | <b>258</b>  | <b>286</b> | <b>321</b> |
| <b>CTL1.2 55 ♂</b> | R1          | R2         | R3         |
| Red                | 90          | 86         | 63         |
| Green              | 87          | 99         | 70         |
| Both               | 151         | 160        | 125        |
| None               | 158         | 196        | 140        |
| <b>Total</b>       | <b>486</b>  | <b>541</b> | <b>398</b> |
| <b>CTL1.2 55 ♀</b> | R1          | R2         | R3         |
| Red                | 194         | 141        | 60         |
| Green              | 185         | 141        | 65         |
| Both               | 381         | 336        | 142        |
| None               | 454         | 295        | 156        |
| <b>Total</b>       | <b>1214</b> | <b>913</b> | <b>423</b> |

**Table S6: Seed count of four different category in each replicate for line CTL1.18**

|                     |            |            |            |
|---------------------|------------|------------|------------|
| <b>CTL1.18 40 ♂</b> | R1         | R2         | R3         |
| Red                 | 51         | 64         | 68         |
| Green               | 38         | 62         | 67         |
| Both                | 139        | 278        | 273        |
| None                | 251        | 268        | 285        |
| <b>Total</b>        | <b>479</b> | <b>672</b> | <b>693</b> |
| <b>CTL1.18 40 ♀</b> | R1         | R2         | R3         |
| Red                 | 29         | 17         | 36         |
| Green               | 19         | 23         | 56         |
| Both                | 355        | 214        | 375        |
| None                | 347        | 244        | 490        |
| <b>Total</b>        | <b>750</b> | <b>498</b> | <b>957</b> |
| <b>CTL1.18 45 ♂</b> | R1         | R2         | R3         |
| Red                 | 67         | 77         | 36         |
| Green               | 54         | 65         | 44         |
| Both                | 231        | 357        | 208        |
| None                | 252        | 407        | 221        |
| <b>Total</b>        | <b>604</b> | <b>906</b> | <b>509</b> |
| <b>CTL1.18 45 ♀</b> | R1         | R2         | R3         |
| Red                 | 23         | 31         | 15         |
| Green               | 25         | 38         | 26         |
| Both                | 371        | 486        | 327        |
| None                | 421        | 453        | 414        |

|                     |            |             |            |
|---------------------|------------|-------------|------------|
| <b>Total</b>        | <b>840</b> | <b>1008</b> | <b>782</b> |
| <b>CTL1.18 50 ♂</b> | R1         | R2          | R3         |
| Red                 | 45         | 21          | 32         |
| Green               | 33         | 20          | 36         |
| Both                | 169        | 170         | 154        |
| None                | 176        | 222         | 165        |
| <b>Total</b>        | <b>423</b> | <b>433</b>  | <b>387</b> |
| <b>CTL1.18 50 ♀</b> | R1         | R2          | R3         |
| Red                 | 18         | 11          | 27         |
| Green               | 12         | 14          | 24         |
| Both                | 164        | 93          | 128        |
| None                | 171        | 128         | 201        |
| <b>Total</b>        | <b>365</b> | <b>246</b>  | <b>380</b> |
| <b>CTL1.18 55 ♂</b> | R1         | R2          | R3         |
| Red                 | 30         | 34          | 32         |
| Green               | 26         | 43          | 33         |
| Both                | 111        | 172         | 137        |
| None                | 132        | 182         | 147        |
| <b>Total</b>        | <b>299</b> | <b>431</b>  | <b>342</b> |
| <b>CTL1.18 55 ♀</b> | R1         | R2          | R3         |
| Red                 | 39         | 36          | 7          |
| Green               | 24         | 26          | 11         |
| Both                | 428        | 282         | 128        |
| None                | 430        | 292         | 86         |
| <b>Total</b>        | <b>921</b> | <b>636</b>  | <b>232</b> |

**Table S7: Seed count of four different category in each replicate for line CTL2.4**

|                    |            |            |            |
|--------------------|------------|------------|------------|
| <b>CTL2.4 40 ♂</b> | R1         | R2         | R3         |
| Red                | 52         | 14         | 19         |
| Green              | 42         | 12         | 18         |
| Both               | 231        | 48         | 49         |
| None               | 277        | 53         | 69         |
| <b>Total</b>       | <b>602</b> | <b>127</b> | <b>155</b> |
| <b>CTL2.4 40 ♀</b> | R1         | R2         | R3         |
| Red                | 56         | 20         | 20         |
| Green              | 51         | 35         | 13         |
| Both               | 373        | 170        | 123        |
| None               | 378        | 126        | 125        |
| <b>Total</b>       | <b>858</b> | <b>351</b> | <b>281</b> |
| <b>CTL2.4 45 ♂</b> | R1         | R2         | R3         |
| Red                | 65         | 52         | 25         |
| Green              | 64         | 45         | 34         |
| Both               | 338        | 242        | 141        |
| None               | 384        | 256        | 145        |
| <b>Total</b>       | <b>851</b> | <b>595</b> | <b>345</b> |
| <b>CTL2.4 45 ♀</b> | R1         | R2         | R3         |
| Red                | 48         | 22         | 19         |
| Green              | 56         | 35         | 21         |

|                    |            |            |            |
|--------------------|------------|------------|------------|
| Both               | 299        | 152        | 137        |
| None               | 305        | 138        | 131        |
| <b>Total</b>       | <b>708</b> | <b>347</b> | <b>302</b> |
| <b>CTL2.4 50 ♂</b> | R1         | R2         | R3         |
| Red                | 49         | 26         | 35         |
| Green              | 40         | 14         | 40         |
| Both               | 208        | 68         | 165        |
| None               | 258        | 97         | 181        |
| <b>Total</b>       | <b>555</b> | <b>205</b> | <b>421</b> |
| <b>CTL2.4 50 ♀</b> | R1         | R2         | R3         |
| Red                | 31         | 45         | 35         |
| Green              | 34         | 40         | 28         |
| Both               | 265        | 277        | 227        |
| None               | 264        | 283        | 219        |
| <b>Total</b>       | <b>594</b> | <b>645</b> | <b>509</b> |
| <b>CTL2.4 55 ♂</b> | R1         | R2         | R3         |
| Red                | 5          | 17         | 15         |
| Green              | 10         | 19         | 18         |
| Both               | 47         | 81         | 71         |
| None               | 43         | 86         | 74         |
| <b>Total</b>       | <b>105</b> | <b>203</b> | <b>178</b> |
| <b>CTL2.4 55 ♀</b> | R1         | R2         | R3         |
| Red                | 16         | 22         | 26         |
| Green              | 24         | 19         | 23         |
| Both               | 119        | 134        | 142        |
| None               | 112        | 127        | 154        |
| <b>Total</b>       | <b>271</b> | <b>302</b> | <b>345</b> |

**Table S8: Seed count of four different category in each replicate for line CTL4.7**

|                     |            |            |            |
|---------------------|------------|------------|------------|
| <b>CTL 4.7 40 ♂</b> | R1         | R2         | R3         |
| Red                 | 35         | 35         | 35         |
| Green               | 37         | 36         | 38         |
| Both                | 94         | 84         | 110        |
| None                | 173        | 112        | 121        |
| <b>Total</b>        | <b>339</b> | <b>267</b> | <b>304</b> |
| <b>CTL 4.7 40 ♀</b> | R1         | R2         | R3         |
| Red                 | 46         | 18         | 26         |
| Green               | 31         | 30         | 27         |
| Both                | 314        | 292        | 258        |
| None                | 386        | 299        | 259        |
| <b>Total</b>        | <b>777</b> | <b>619</b> | <b>570</b> |
| <b>CTL 4.7 45 ♂</b> | R1         | R2         | R3         |
| Red                 | 71         | 110        | 91         |
| Green               | 100        | 100        | 86         |
| Both                | 251        | 326        | 256        |
| None                | 278        | 348        | 265        |
| <b>Total</b>        | <b>700</b> | <b>884</b> | <b>698</b> |
| <b>CTL 4.7 45 ♀</b> | R1         | R2         | R3         |
| Red                 | 19         | 29         | 52         |
| Green               | 24         | 30         | 54         |

|                     |            |            |             |
|---------------------|------------|------------|-------------|
| Both                | 268        | 308        | 539         |
| None                | 268        | 301        | 517         |
| <b>Total</b>        | <b>579</b> | <b>668</b> | <b>1162</b> |
| <b>CTL 4.7 50 ♂</b> | R1         | R2         | R3          |
| Red                 | 48         | 58         | 38          |
| Green               | 50         | 57         | 49          |
| Both                | 182        | 179        | 130         |
| None                | 141        | 211        | 163         |
| <b>Total</b>        | <b>421</b> | <b>505</b> | <b>380</b>  |
| <b>CTL 4.7 50 ♀</b> | R1         | R2         | R3          |
| Red                 | 27         | 15         | 15          |
| Green               | 24         | 22         | 17          |
| Both                | 255        | 201        | 138         |
| None                | 292        | 219        | 160         |
| <b>Total</b>        | <b>598</b> | <b>457</b> | <b>387</b>  |
| <b>CTL 4.7 55 ♂</b> | R1         | R2         | R3          |
| Red                 | 19         | 35         | 42          |
| Green               | 26         | 38         | 50          |
| Both                | 96         | 132        | 150         |
| None                | 79         | 140        | 170         |
| <b>Total</b>        | <b>220</b> | <b>345</b> | <b>412</b>  |
| <b>CTL 4.7 55 ♀</b> | R1         | R2         | R3          |
| Red                 | 45         | 47         | 30          |
| Green               | 36         | 46         | 37          |
| Both                | 425        | 446        | 345         |
| None                | 450        | 457        | 330         |
| <b>Total</b>        | <b>956</b> | <b>996</b> | <b>742</b>  |

**Table S9: Seed count of four different category in each replicate for line CTL5.17**

|                      |            |            |            |
|----------------------|------------|------------|------------|
| <b>CTL 5.17 40 ♂</b> | R1         | R2         | R3         |
| Red                  | 58         | 67         | 31         |
| Green                | 65         | 61         | 40         |
| Both                 | 299        | 311        | 147        |
| None                 | 323        | 329        | 181        |
| <b>Total</b>         | <b>745</b> | <b>768</b> | <b>399</b> |
| <b>CTL 5.17 40 ♀</b> | R1         | R2         | R3         |
| Red                  | 12         | 10         | 8          |
| Green                | 9          | 8          | 9          |
| Both                 | 221        | 149        | 160        |
| None                 | 233        | 167        | 177        |
| <b>Total</b>         | <b>475</b> | <b>334</b> | <b>354</b> |
| <b>CTL 5.17 45 ♂</b> | R1         | R2         | R3         |
| Red                  | 56         | 57         | 26         |
| Green                | 70         | 61         | 31         |
| Both                 | 283        | 272        | 151        |
| None                 | 295        | 271        | 156        |
| <b>Total</b>         | <b>700</b> | <b>661</b> | <b>364</b> |
| <b>CTL 5.1745 ♀</b>  | R1         | R2         | R3         |
| Red                  | 44         | 20         | 22         |
| Green                | 41         | 16         | 23         |

|                      |             |            |            |
|----------------------|-------------|------------|------------|
| Both                 | 739         | 310        | 444        |
| None                 | 585         | 341        | 469        |
| <b>Total</b>         | <b>1409</b> | <b>687</b> | <b>958</b> |
| <b>CTL 5.17 50 ♂</b> | R1          | R2         | R3         |
| Red                  | 43          | 20         | 31         |
| Green                | 58          | 29         | 37         |
| Both                 | 196         | 150        | 168        |
| None                 | 220         | 193        | 185        |
| <b>Total</b>         | <b>517</b>  | <b>392</b> | <b>421</b> |
| <b>CTL 5.17 50 ♀</b> | R1          | R2         | R3         |
| Red                  | 13          | 9          | 9          |
| Green                | 12          | 10         | 12         |
| Both                 | 311         | 142        | 185        |
| None                 | 308         | 143        | 199        |
| <b>Total</b>         | <b>644</b>  | <b>304</b> | <b>405</b> |
| <b>CTL 5.17 55 ♂</b> | R1          | R2         | R3         |
| Red                  | 20          | 25         | 27         |
| Green                | 27          | 32         | 35         |
| Both                 | 82          | 145        | 172        |
| None                 | 123         | 152        | 187        |
| <b>Total</b>         | <b>252</b>  | <b>354</b> | <b>421</b> |
| <b>CTL 5.17 55 ♀</b> | R1          | R2         | R3         |
| Red                  | 10          | 10         | 6          |
| Green                | 19          | 11         | 8          |
| Both                 | 221         | 170        | 128        |
| None                 | 227         | 163        | 136        |
| <b>Total</b>         | <b>477</b>  | <b>354</b> | <b>278</b> |

**Table S10: Recombination frequencies in the progeny of a cross between parents of CO detector line and wild type Columbia plants of different ages (CTL1.2)**

| Cross              | Recombination frequencies (R)/Seeds per replicate (S) |           |           | Mean CO Rate |
|--------------------|-------------------------------------------------------|-----------|-----------|--------------|
|                    | R1/S1                                                 | R2/S2     | R3/S3     |              |
| CTL1.2 40 X Col 40 | 31.29/930                                             | 30.49/469 | 25.14/366 | 28.9733      |
| Col 40 X CTL1.2 40 | 29.02/485                                             | 28.93/473 | 26.4/590  | 28.1167      |
| CTL1.2 45 X Col 45 | 25.19/1137                                            | 25.52/674 | 25.36/606 | 25.3567      |
| Col 45 X CTL1.2    | 31.22/721                                             | 30.89/690 | 29.55/175 | 30.5533      |

|                                            |            |           |           |              |
|--------------------------------------------|------------|-----------|-----------|--------------|
| 45                                         |            |           |           |              |
| CTL1.2 50 X Col 50                         | 33.81/258  | 31.5/286  | 26.45/321 | 30.5867      |
| Col 50 X CTL1.2 50                         | 39.11/363  | 37.82/320 | 37.14/432 | 38.0233      |
| CTL1.2 55 X Col 55                         | 34.71/1214 | 29.38/913 | 27.77/423 | 30.62        |
| Col 55 X CTL1.2 55                         | 36.42/486  | 34.1/541  | 33.14/398 | 34.5533      |
| <b>Comparison between different groups</b> |            |           |           |              |
| Cross                                      |            |           | P Value   | Significance |
| CTL1.2 40 X Col 40-CTL1.2 45 X Col 45      |            |           | 0.9997    | NS           |
| CTL1.2 40 X Col 40-CTL1.2 50 X Col 50      |            |           | 0.4889    | NS           |
| CTL1.2 40 X Col 40-CTL1.2 55 X Col 55      |            |           | 0.9874    | NS           |
| CTL1.2 45 X Col 45-CTL1.2 50 X Col 50      |            |           | 0.7912    | NS           |
| CTL1.2 45 X Col 45-CTL1.2 55 X Col 55      |            |           | 0.8774    | NS           |
| CTL1.2 50 X Col 50-CTL1.2 55 X Col 55      |            |           | 0.0911    | NS           |
| Col 40 X CTL1.2 40- Col 45 X CTL1.2 45     |            |           | 0.0610    | NS           |
| Col 40 X CTL1.2 40- Col 50 X CTL1.2 50     |            |           | 1.0000    | NS           |
| Col 40 X CTL1.2 40- Col 55 X CTL1.2 55     |            |           | 0.3682    | NS           |
| Col 45 X CTL1.2 45- Col 50 X CTL1.2 50     |            |           | 0.5130    | NS           |
| Col 45 X CTL1.2 45- Col 55 X CTL1.2 55     |            |           | 0.5435    | NS           |
| Col 50 X CTL1.2 50- Col 55 X CTL1.2 55     |            |           | 0.3787    | NS           |
| CTL1.2 40 X Col 40- Col 40 X CTL1.2 40     |            |           | 0.9858    | NS           |
| CTL1.2 45 X Col 45- Col 45 X CTL1.2 45     |            |           | <0.01     | **           |
| CTL1.2 50 X Col 50- Col 50 X CTL1.2 50     |            |           | 0.0837    | NS           |
| CTL1.2 55 X Col 55- Col 55 X CTL1.2 55     |            |           | 0.3576    | NS           |

**Table S11: Recombination frequencies in the progeny of a cross between parents of CO detector line and wild type Columbia plants of different ages (CTL1.18)**

| Cross               | Recombination frequencies (R)/Seeds per replicate (S) |            |          | Mean CO Rate |
|---------------------|-------------------------------------------------------|------------|----------|--------------|
|                     | R1/S1                                                 | R2/S2      | R3/S3    |              |
| CTL1.18 40 X Col 40 | 6.4/750                                               | 8.03/498   | 9.6/957  | 8.01         |
| Col 40 X CTL1.18 40 | 5.71/479                                              | 6.85/672   | 5.24/693 | 5.93         |
| CTL1.18 45 X Col 45 | 8.22/840                                              | 10.16/1008 | 9.19/782 | 9.19         |
| Col 45 X CTL1.18    | 6.84/604                                              | 9.75/906   | 7.76/509 | 8.12         |

|                                            |           |           |           |              |
|--------------------------------------------|-----------|-----------|-----------|--------------|
| 45                                         |           |           |           |              |
| CTL1.18 50 X Col 50                        | 18.58/365 | 18.75/246 | 19.49/380 | 18.94        |
| Col 50 X CTL1.18 50                        | 20.03/423 | 15.67/433 | 15.72/387 | 17.14        |
| CTL1.18 55 X Col 55                        | 18.44/921 | 16.42/636 | 17.43/323 | 17.43        |
| Col 55 X CTL1.18 55                        | 18.73/299 | 17.87/431 | 18.3/342  | 18.3         |
| <b>Comparison between different groups</b> |           |           |           |              |
| Cross                                      |           |           | P Value   | Significance |
| CTL1.18 40 X Col 40-CTL1.18 45 X Col 45    |           |           | 0.4502    | NS           |
| CTL1.18 40 X Col 40-CTL1.18 50 X Col 50    |           |           | 0.9375    | NS           |
| CTL1.18 40 X Col 40-CTL1.18 55 X Col 55    |           |           | 1.0000    | NS           |
| CTL1.18 45 X Col 45-CTL1.18 50 X Col 50    |           |           | 0.0556    | NS           |
| CTL1.18 45 X Col 45-CTL1.18 55 X Col 55    |           |           | 0.3839    | NS           |
| CTL1.18 50 X Col 50-CTL1.18 55 X Col 55    |           |           | 0.9618    | NS           |
| Col 40 X CTL1.18 40- Col 45 X CTL1.18 45   |           |           | 0.6316    | NS           |
| Col 40 X CTL1.18 40- Col 50 X CTL1.18 50   |           |           | 0.8060    | NS           |
| Col 40 X CTL1.18 40- Col 55 X CTL1.18 55   |           |           | 0.9982    | NS           |
| Col 45 X CTL1.18 45- Col 50 X CTL1.18 50   |           |           | 1.0000    | NS           |
| Col 45 X CTL1.18 45- Col 55 X CTL1.18 55   |           |           | 0.9427    | NS           |
| Col 50 X CTL1.18 50- Col 55 X CTL1.18 55   |           |           | 0.9883    | NS           |
| CTL1.18 40 X Col 40- Col 40 X CTL1.18 40   |           |           | <0.001    | ***          |
| CTL1.18 45 X Col 45- Col 45 X CTL1.18 45   |           |           | <0.001    | ***          |
| CTL1.18 50 X Col 50- Col 50 X CTL1.18 50   |           |           | <0.001    | ***          |
| CTL1.18 55 X Col 55- Col 55 X CTL1.18 55   |           |           | <0.001    | ***          |

**Table S12: Recombination frequencies in the progeny of a cross between parents of CO detector line and wild type Columbia plants of different ages (CTL2.4)**

| Cross              | Recombination frequencies (R)/Seeds per replicate (S) |           |           | Mean CO Rate |
|--------------------|-------------------------------------------------------|-----------|-----------|--------------|
|                    | R1/S1                                                 | R2/S2     | R3/S3     |              |
| CTL2.4 40 X Col 40 | 12.48/858                                             | 15.67/351 | 11.74/281 | 13.2967      |
| Col 40 X CTL2.4 40 | 14.69/602                                             | 16.43/127 | 12.99/155 | 14.7033      |
| CTL2.4 45 X Col 45 | 10.94/708                                             | 13.18/347 | 10.42/308 | 11.5133      |

|                                            |           |           |           |              |
|--------------------------------------------|-----------|-----------|-----------|--------------|
| Col 45 X CTL2.4 45                         | 14.76/851 | 13.58/595 | 14.17/345 | 14.17        |
| CTL2.4 50 X Col 50                         | 15.61/594 | 20.47/645 | 23.88/499 | 19.9867      |
| Col 50 X CTL2.4 50                         | 15.16/555 | 16.3/205  | 17.1/421  | 16.1867      |
| CTL2.4 55 X Col 55                         | 16.04/271 | 19.51/302 | 17.78/345 | 17.7767      |
| Col 55 X CTL2.4 55                         | 16.76/105 | 17.5/203  | 18.1/178  | 17.4533      |
| <b>Comparison between different groups</b> |           |           |           |              |
| Cross                                      |           |           | P Value   | Significance |
| CTL2.4 40 X Col 40-CTL2.4 45 X Col 45      |           |           | 0.982     | NS           |
| CTL2.4 40 X Col 40-CTL2.4 50 X Col 50      |           |           | 0.934     | NS           |
| CTL2.4 40 X Col 40-CTL2.4 55 X Col 55      |           |           | 0.999     | NS           |
| CTL2.4 45 X Col 45-CTL2.4 50 X Col 50      |           |           | 0.414     | NS           |
| CTL2.4 45 X Col 45-CTL2.4 55 X Col 55      |           |           | 1.000     | NS           |
| CTL2.4 50 X Col 50-CTL2.4 55 X Col 55      |           |           | 0.647     | NS           |
| Col 40 X CTL2.4 40- Col 45 X CTL2.4 45     |           |           | 0.202     | NS           |
| Col 40 X CTL2.4 40- Col 50 X CTL2.4 50     |           |           | 0.822     | NS           |
| Col 40 X CTL2.4 40- Col 55 X CTL2.4 55     |           |           | 0.700     | NS           |
| Col 45 X CTL2.4 45- Col 50 X CTL2.4 50     |           |           | 0.964     | NS           |
| Col 45 X CTL2.4 45- Col 55 X CTL2.4 55     |           |           | 0.990     | NS           |
| Col 50 X CTL2.4 50- Col 55 X CTL2.4 55     |           |           | 1.000     | NS           |
| CTL2.4 40 X Col 40- Col 40 X CTL2.4 40     |           |           | <0.01     | ***          |
| CTL2.4 45 X Col 45- Col 45 X CTL2.4 45     |           |           | 0.975     | NS           |
| CTL2.4 50 X Col 50- Col 50 X CTL2.4 50     |           |           | <0.01     | **           |
| CTL2.4 55 X Col 55- Col 55 X CTL2.4 55     |           |           | 0.376     | NS           |

**Table S13: Recombination frequencies in the progeny of a cross between parents of CO detector line and wild type Columbia plants of different ages (CTL4.7)**

| Cross              | Recombination frequency (R)/Seeds per replicate (S) |           |           | Mean CO Rate |
|--------------------|-----------------------------------------------------|-----------|-----------|--------------|
|                    | R1/S1                                               | R2/S2     | R3/S3     |              |
| CTL4.7 40 X Col 40 | 9.9/777                                             | 7.75/619  | 9.3/570   | 8.9833       |
| Col 40 X CTL4.7 40 | 21.24/339                                           | 26.59/267 | 23.91/304 | 23.9133      |
| CTL4.7 45 X Col 45 | 7.43/579                                            | 8.83/668  | 9.12/1162 | 8.46         |

|                                            |           |           |              |         |
|--------------------------------------------|-----------|-----------|--------------|---------|
| Col 45 X CTL4.7 45                         | 24.43/700 | 23.76/884 | 25.36/698    | 24.5167 |
| CTL4.7 50 X Col 50                         | 8.53/598  | 8.16/457  | 8.34/387     | 8.3433  |
| Col 50 X CTL4.7 50                         | 23.28/421 | 22.77/505 | 22.89/380    | 22.98   |
| CTL4.7 55 X Col 55                         | 8.47/956  | 9.34/996  | 8.9/742      | 8.9033  |
| Col 55 X CTL4.7 55                         | 20.45/220 | 21.23/345 | 22.15/412    | 21.2767 |
| <b>Comparison between different groups</b> |           |           |              |         |
| Cross                                      | P Value   |           | Significance |         |
| CTL4.7 40 X Col 40-CTL4.7 45 X Col 45      | 0.999     |           | NS           |         |
| CTL4.7 40 X Col 40-CTL4.7 50 X Col 50      | 0.996     |           | NS           |         |
| CTL4.7 40 X Col 40-CTL4.7 55 X Col 55      | 1.000     |           | NS           |         |
| CTL4.7 45 X Col 45-CTL4.7 50 X Col 50      | 1.000     |           | NS           |         |
| CTL4.7 45 X Col 45-CTL4.7 55 X Col 55      | 0.999     |           | NS           |         |
| CTL4.7 50 X Col 50-CTL4.7 55 X Col 55      | 0.998     |           | NS           |         |
| Col 40 X CTL4.7 40- Col 45 X CTL4.7 45     | 0.997     |           | NS           |         |
| Col 40 X CTL4.7 40- Col 50 X CTL4.7 50     | 0.964     |           | NS           |         |
| Col 40 X CTL4.7 40- Col 55 X CTL4.7 55     | 0.070     |           | NS           |         |
| Col 45 X CTL4.7 45- Col 50 X CTL4.7 50     | 0.664     |           | NS           |         |
| Col 45 X CTL4.7 45- Col 55 X CTL4.7 55     | 0.009     |           | NS           |         |
| Col 50 X CTL4.7 50- Col 55 X CTL4.7 55     | 0.539     |           | NS           |         |
| CTL4.7 40 X Col 40- Col 40 X CTL4.7 40     | <0.001    |           | ***          |         |
| CTL4.7 45 X Col 45- Col 45 X CTL4.7 45     | <0.001    |           | ***          |         |
| CTL4.7 50 X Col 50- Col 50 X CTL4.7 50     | <0.001    |           | ***          |         |
| CTL4.7 55 X Col 55- Col 55 X CTL4.7 55     | <0.001    |           | ***          |         |

**Table S14: Recombination frequencies in the progeny of a cross between parents of CO detector line and wild type Columbia plants of different ages (Col3-4/20)**

| Cross                 | Recombination frequency (R)/Seeds per replicate (S) |                   |       |       |       |       |       |       |       | Mean CO Rate |
|-----------------------|-----------------------------------------------------|-------------------|-------|-------|-------|-------|-------|-------|-------|--------------|
|                       | R1/S1                                               | R2/S <sub>2</sub> | R3/S3 | R4/S4 | R5/S5 | R6/S6 | R7/S7 | R8/S8 | R9/S9 |              |
| Col3-4/20 40 X Col 40 | 8.07                                                | 8.61              | 10    | 7.46  | 8.95  | 12    |       |       |       | 9.18167      |
|                       | 233                                                 | 511               | 320   | 268   | 268   | 475   |       |       |       |              |

|                             |       |       |       |       |       |       |       |       |       |         |
|-----------------------------|-------|-------|-------|-------|-------|-------|-------|-------|-------|---------|
| Col 40 X<br>Col3-4/20<br>40 | 23.29 | 20.72 | 21.78 | 27.51 | 21.9  | 23.67 |       |       |       | 23.145  |
|                             | 176   | 193   | 303   | 378   | 242   | 511   |       |       |       |         |
| Col3-4/20<br>45 X Col 45    | 8.82  | 8.4   | 8.01  | 10.26 | 11.74 | 9.57  | 8.36  | 6.61  | 8.19  | 8.97125 |
|                             | 612   | 702   | 287   | 565   | 681   | 355   | 622   | 590   | 122   |         |
| Col 45 X<br>Col3-4/20<br>45 | 23.43 | 20.45 | 20.66 | 25.36 | 24.14 | 25    | 28.01 | 27.07 | 27.54 | 24.265  |
|                             | 431   | 396   | 150   | 138   | 758   | 268   | 257   | 314   | 511   |         |
| Col3-4/20<br>50 X Col 50    | 9.57  | 7.4   | 7.27  | 10.97 | 9.85  | 9.64  |       |       |       | 9.44    |
|                             | 658   | 378   | 522   | 401   | 406   | 311   |       |       |       |         |
| Col 50 X<br>Col3-4/20<br>50 | 26.06 | 27.19 | 22.49 | 20.68 | 28.44 | 23.61 |       |       |       | 24.6988 |
|                             | 211   | 1140  | 609   | 290   | 334   | 199   |       |       |       |         |
| Col3-4/20<br>55 X Col 55    | 9.6   | 11.48 | 5.75  | 6.26  | 6.8   | 7.35  | 8.87  | 8.04  | 8.53  | 8.01875 |
|                             | 500   | 444   | 191   | 527   | 354   | 340   | 248   | 261   | 668   |         |
| Col 55 X<br>Col3-4/20<br>55 | 20.27 | 30.43 | 18.91 | 21.5  | 24    | 22.05 | 23.39 | 32.03 | 27.78 | 24.0725 |
|                             | 148   | 138   | 185   | 413   | 229   | 217   | 218   | 231   | 511   |         |

#### Comparison between different groups

| Cross                                        | P Value | Significance         |
|----------------------------------------------|---------|----------------------|
| Col3-4/20 40 X Col 40-Col3-4/20 45 X Col 45  | 1.000   | Non-Significant (NS) |
| Col3-4/20 40 X Col 40-Col3-4/20 50 X Col 50  | 1.000   | NS                   |
| Col3-4/20 40 X Col 40-Col3-4/20 55 X Col 55  | 0.996   | NS                   |
| Col3-4/20 45 X Col 45-Col3-4/20 50 X Col 50  | 1.000   | NS                   |
| Col3-4/20 45 X Col 45-Col3-4/20 55 X Col 55  | 0.999   | NS                   |
| Col3-4/20 50 X Col 50-Col3-4/20 55 X Col 55  | 0.970   | NS                   |
| Col 40 X Col3-4/20 40- Col 45 X Col3-4/20 45 | 0.976   | NS                   |
| Col 40 X Col3-4/20 40- Col 50 X Col3-4/20 50 | 0.981   | NS                   |
| Col 40 X Col3-4/20 40- Col 55 X Col3-4/20 55 | 1.000   | NS                   |
| Col 45 X Col3-4/20 45- Col 50 X Col3-4/20 50 | 1.000   | NS                   |
| Col 45 X Col3-4/20 45- Col 55 X Col3-4/20 55 | 0.712   | NS                   |
| Col 50 X Col3-4/20 50- Col 55 X Col3-4/20 55 | 0.735   | NS                   |
| Col3-4/20 40 X Col 40- Col 40 X Col3-4/20 40 | <0.001  | ***                  |
| Col3-4/20 45 X Col 45- Col 45 X Col3-4/20 45 | <0.001  | ***                  |
| Col3-4/20 50 X Col 50- Col 50 X Col3-4/20 50 | <0.001  | ***                  |
| Col3-4/20 55 X Col 55- Col 55 X Col3-4/20 55 | <0.001  | ***                  |

**Table S15: Recombination frequencies in the progeny of a cross between parents of CO detector line and wild type Columbia plants of different ages (3158)**

| Cross                               | Recombination frequency (R)/Seeds per replicate (S) |       |       |       |       |         |       |              |       | Mean<br>CO<br>Rate |
|-------------------------------------|-----------------------------------------------------|-------|-------|-------|-------|---------|-------|--------------|-------|--------------------|
|                                     | R1/S1                                               | R2/S2 | R3/S3 | R4/S4 | R5/S5 | R6/S6   | R7/S7 | R8/S8        | R9/S9 |                    |
| 3158 40 X<br>Col 40                 | 10                                                  | 9.53  | 15.41 | 9.32  | 11.77 | 14.47   |       |              |       | 11.75              |
|                                     | 580                                                 | 619   | 597   | 504   | 781   | 995     |       |              |       |                    |
| Col 40 X<br>3158 40                 | 25.21                                               | 26.33 | 26.33 | 29.54 | 26.99 | 30.16   |       |              |       | 27.4266            |
|                                     | 230                                                 | 281   | 346   | 264   | 363   | 885     |       |              |       |                    |
| 3158 45 X<br>Col 45                 | 12                                                  | 9.94  | 7.98  | 9.51  | 10.99 | 10.2    | 12.75 | 12.58        | 9.78  | 10.6366            |
|                                     | 500                                                 | 784   | 213   | 389   | 646   | 147     | 1215  | 858          | 276   |                    |
| Col 45 X<br>3158 45                 | 23.81                                               | 24.6  | 25.62 | 25.24 | 26.29 | 27.89   | 22.89 | 24.35        | 23.62 | 24.9233            |
|                                     | 953                                                 | 263   | 111   | 103   | 559   | 294     | 83    | 386          | 452   |                    |
| 3158 50 X<br>Col 50                 | 9.1                                                 | 10.59 | 10.57 | 8.27  | 12.88 | 11.23   |       |              |       | 10.5577            |
|                                     | 670                                                 | 151   | 709   | 810   | 326   | 463     |       |              |       |                    |
| Col 50 X<br>3158 50                 | 25.43                                               | 22.92 | 25.18 | 25.85 | 26.13 | 25.99   |       |              |       | 25.4966            |
|                                     | 287                                                 | 253   | 1100  | 294   | 528   | 245     |       |              |       |                    |
| 3158 55 X<br>Col 55                 | 12.83                                               | 14.67 | 9.9   | 5.98  | 12.92 | 10.26   | 8.69  | 12.19        | 7.9   | 10.5933            |
|                                     | 1067                                                | 1097  | 323   | 167   | 565   | 224     | 276   | 1009         | 329   |                    |
| Col 55 X<br>3158 55                 | 28.12                                               | 28.42 | 27.82 | 23.69 | 23.69 | 23.69   | 22.3  | 25           | 22.09 | 24.9633            |
|                                     | 129                                                 | 570   | 345   | 595   | 465   | 130     | 712   | 267          | 352   |                    |
| Comparison between different groups |                                                     |       |       |       |       |         |       |              |       |                    |
| Cross                               |                                                     |       |       |       |       | P Value |       | Significance |       |                    |
| 3158 40 X Col 40-3158 45 X Col 45   |                                                     |       |       |       |       | 0.932   |       | NS           |       |                    |
| 3158 40 X Col 40-3158 50 X Col 50   |                                                     |       |       |       |       | 0.932   |       | NS           |       |                    |
| 3158 40 X Col 40-3158 55 X Col 55   |                                                     |       |       |       |       | 0.941   |       | NS           |       |                    |
| 3158 45 X Col 45-3158 50 X Col 50   |                                                     |       |       |       |       | 1.000   |       | NS           |       |                    |
| 3158 45 X Col 45-3158 55 X Col 55   |                                                     |       |       |       |       | 1.000   |       | NS           |       |                    |
| 3158 50 X Col 50-3158 55 X Col 55   |                                                     |       |       |       |       | 1.000   |       | NS           |       |                    |
| Col 40 X 3158 40- Col 45 X 3158 45  |                                                     |       |       |       |       | 0.253   |       | NS           |       |                    |
| Col 40 X 3158 40- Col 50 X 3158 50  |                                                     |       |       |       |       | 0.598   |       | NS           |       |                    |
| Col 40 X 3158 40- Col 55 X 3158 55  |                                                     |       |       |       |       | 0.236   |       | NS           |       |                    |
| Col 45 X 3158 45- Col 50 X 3158 50  |                                                     |       |       |       |       | 0.998   |       | NS           |       |                    |

|                                    |       |     |
|------------------------------------|-------|-----|
| Col 45 X 3158 45- Col 55 X 3158 55 | 1.000 | NS  |
| Col 50 X 3158 50- Col 55 X 3158 55 | 0.997 | NS  |
| 3158 40 X Col 40- Col 40 X 3158 40 | <0.01 | *** |
| 3158 45 X Col 45- Col 45 X 3158 45 | <0.01 | *** |
| 3158 50 X Col 50- Col 50 X 3158 50 | <0.01 | *** |
| 3158 55 X Col 55- Col 55 X 3158 55 | <0.01 | *** |

**Table S16: Recombination frequencies in the progeny of a cross between parents of CO detector line and wild type Columbia plants of different ages (3162)**

| Cross                               | Recombination frequency (R)/Seeds per replicate (S) |       |       |       |       |         |       |              |       | Mean<br>CO<br>Rate |
|-------------------------------------|-----------------------------------------------------|-------|-------|-------|-------|---------|-------|--------------|-------|--------------------|
|                                     | R1/S1                                               | R2/S2 | R3/S3 | R4/S4 | R5/S5 | R6/S6   | R7/S7 | R8/S8        | R9/S9 |                    |
| 3162 40 X<br>Col 40                 | 14.51                                               | 19.72 | 17.11 | 17.11 | 16.96 | 16.02   |       |              |       | 16.905             |
|                                     | 503                                                 | 507   | 495   | 333   | 825   | 699     |       |              |       |                    |
| Col 40 X<br>3162 40                 | 14.83                                               | 22.38 | 18.35 | 23.14 | 16.41 | 20      |       |              |       | 19.185             |
|                                     | 236                                                 | 210   | 409   | 363   | 262   | 569     |       |              |       |                    |
| 3162 45 X<br>Col 45                 | 16.41                                               | 15.09 | 16.18 | 14.25 | 15.57 | 13.51   | 13.11 | 15.45        | 14.46 | 14.8922            |
|                                     | 798                                                 | 669   | 241   | 505   | 687   | 148     | 900   | 893          | 235   |                    |
| Col 45 X<br>3162 45                 | 19.64                                               | 18.04 | 19.65 | 22.18 | 18.56 | 20.37   | 19.2  | 21.01        | 20.1  | 19.8611            |
|                                     | 285                                                 | 388   | 234   | 604   | 528   | 354     | 276   | 295          | 284   |                    |
| 3162 50 X<br>Col 50                 | 16.3                                                | 10.85 | 14.34 | 11.33 | 11.53 | 13.97   |       |              |       | 12.7944            |
|                                     | 368                                                 | 258   | 669   | 247   | 390   | 415     |       |              |       |                    |
| Col 50 X<br>3162 50                 | 19.17                                               | 20.51 | 22.87 | 17.51 | 20.09 | 18.8    |       |              |       | 19.4833            |
|                                     | 219                                                 | 351   | 529   | 394   | 403   | 439     |       |              |       |                    |
| 3162 55 X<br>Col 55                 | 14.85                                               | 17.71 | 16.28 | 12.63 | 13.9  | 14.04   | 11.79 | 14.81        | 13.3  | 14.3677            |
|                                     | 175                                                 | 1287  | 463   | 182   | 302   | 598     | 602   | 243          | 351   |                    |
| Col 55 X<br>3162 55                 | 13.71                                               | 19.65 | 21.2  | 18.98 | 14.17 | 15.34   | 22.06 | 23           | 21.12 | 18.8033            |
|                                     | 226                                                 | 234   | 580   | 158   | 261   | 352     | 169   | 552          | 232   |                    |
| Comparison between different groups |                                                     |       |       |       |       |         |       |              |       |                    |
| Cross                               |                                                     |       |       |       |       | P Value |       | Significance |       |                    |
| 3162 40 X Col 40-3162 45 X Col 45   |                                                     |       |       |       |       | 0.54900 |       | NS           |       |                    |

|                                    |         |     |
|------------------------------------|---------|-----|
| 3162 40 X Col 40-3162 50 X Col 50  | 0.00439 | **  |
| 3162 40 X Col 40-3162 55 X Col 55  | 0.25239 | NS  |
| 3162 45 X Col 45-3162 50 X Col 50  | 0.34817 | NS  |
| 3162 45 X Col 45-3162 55 X Col 55  | 0.99924 | NS  |
| 3162 50 X Col 50-3162 55 X Col 55  | 0.70599 | NS  |
| Col 40 X 3162 40- Col 45 X 3162 45 | 0.99810 | NS  |
| Col 40 X 3162 40- Col 50 X 3162 50 | 0.99999 | NS  |
| Col 40 X 3162 40- Col 55 X 3162 55 | 0.99996 | NS  |
| Col 45 X 3162 45- Col 50 X 3162 50 | 0.99991 | NS  |
| Col 45 X 3162 45- Col 55 X 3162 55 | 0.94928 | NS  |
| Col 50 X 3162 50- Col 55 X 3162 55 | 0.99602 | NS  |
| 3162 40 X Col 40- Col 40 X 3162 40 | 0.50437 | NS  |
| 3162 45 X Col 45- Col 45 X 3162 45 | < 0.001 | *** |
| 3162 50 X Col 50- Col 50 X 3162 50 | < 0.001 | *** |
| 3162 55 X Col 55- Col 55 X 3162 55 | < 0.001 | *** |

**Table S17: Recombination frequencies in the progeny of a cross between parents of CO detector line and wild type Columbia plants of different ages (CTL5.17)**

| Cross                                      | Recombination frequency (R)/Seeds per replicate (S) |           |              | Mean CO Rate |
|--------------------------------------------|-----------------------------------------------------|-----------|--------------|--------------|
|                                            | R1/S1                                               | R2/S2     | R3/S3        |              |
| CTL5.17 40 X Col 40                        | 4.42/475                                            | 5.39/334  | 4.9/354      | 4.9033       |
| Col 40 X CTL5.17 40                        | 6.03/745                                            | 5.24/768  | 4.7/399      | 5.3233       |
| CTL5.17 45 X Col 45                        | 3.88/1409                                           | 6.25/687  | 5.07/958     | 5.0667       |
| Col 45 X CTL5.17 45                        | 6.08/704                                            | 5.93/661  | 4.78/364     | 5.5967       |
| CTL5.17 50 X Col 50                        | 16.51/644                                           | 16.67/304 | 17.79/405    | 16.99        |
| Col 50 X CTL5.17 50                        | 17.9/517                                            | 17.85/392 | 15.66/421    | 17.1367      |
| CTL5.17 55 X Col 55                        | 19.54/477                                           | 12.05/354 | 16.02/278    | 15.87        |
| Col 55 X CTL5.17 55                        | 18.65/252                                           | 16.1/354  | 14.78/421    | 16.51        |
| <b>Comparison between different groups</b> |                                                     |           |              |              |
| Cross                                      | P Value                                             |           | Significance |              |

|                                          |       |     |
|------------------------------------------|-------|-----|
| CTL5.17 40 X Col 40-CTL5.17 45 X Col 45  | 1.000 | NS  |
| CTL5.17 40 X Col 40-CTL5.17 50 X Col 50  | 1.000 | NS  |
| CTL5.17 40 X Col 40-CTL5.17 55 X Col 55  | 0.999 | NS  |
| CTL5.17 45 X Col 45-CTL5.17 50 X Col 50  | 1.000 | NS  |
| CTL5.17 45 X Col 45-CTL5.17 55 X Col 55  | 1.000 | NS  |
| CTL5.17 50 X Col 50-CTL5.17 55 X Col 55  | 1.000 | NS  |
| Col 40 X CTL5.17 40- Col 45 X CTL5.17 45 | 1.000 | NS  |
| Col 40 X CTL5.17 40- Col 50 X CTL5.17 50 | 0.987 | NS  |
| Col 40 X CTL5.17 40- Col 55 X CTL5.17 55 | 1.000 | NS  |
| Col 45 X CTL5.17 45- Col 50 X CTL5.17 50 | 0.974 | NS  |
| Col 45 X CTL5.17 45- Col 55 X CTL5.17 55 | 1.000 | NS  |
| Col 50 X CTL5.17 50- Col 55 X CTL5.17 55 | 1.000 | NS  |
| CTL5.17 40 X Col 40- Col 40 X CTL5.17 40 | <.001 | *** |
| CTL5.17 45 X Col 45- Col 45 X CTL5.17 45 | <.001 | *** |
| CTL5.17 50 X Col 50- Col 50 X CTL5.17 50 | <.001 | *** |
| CTL5.17 55 X Col 55- Col 55 X CTL5.17 55 | <.001 | *** |

**Table S18: Line-wise male and female mean ratio comparisons**

| CO line                               | Mean    | SEM                  |
|---------------------------------------|---------|----------------------|
| CTL1.2                                | 1.1875  | 0.124466             |
| CTL1.18                               | 2.35    | 0.409959             |
| CTL2.4                                | 1.3425  | 0.212348             |
| COL3-4/20                             | 2.6875  | 0.299819             |
| 3158                                  | 2.335   | 0.13404              |
| CTL4.7                                | 2.6775  | 0.209821             |
| 3162                                  | 1.2275  | 0.194829             |
| CTL15.17                              | 3.1925  | 0.216391             |
| Comparison between different CO lines |         |                      |
| Cross                                 | P Value | Significance         |
| CLT2.4-3158                           | <0.001  | ***                  |
| CLT2.4-3162                           | 0.9976  | Non-Significant (NS) |
| CLT2.4-CLT4.7                         | <0.001  | ***                  |
| CLT2.4-CLT5.17                        | <0.001  | ***                  |
| CLT2.4-Col3-4/20                      | <0.001  | ***                  |
| CLT2.4-CLT1.18                        | <0.001  | ***                  |

|                       |        |     |
|-----------------------|--------|-----|
| CLT2.4-<br>CLT1.2     | 0.9853 | NS  |
| 3158-3162             | <0.001 | *** |
| 3158-CLT4.7           | 0.4759 | NS  |
| 3158-<br>CLT5.17      | <0.001 | *** |
| 3158-Col3-<br>4/20    | 0.4365 | NS  |
| 3158-<br>CLT1.18      | 1.0000 | NS  |
| 3158-CLT1.2           | <0.001 | *** |
| 3162-CLT4.7           | <0.001 | *** |
| 3162-<br>CLT5.17      | <0.001 | *** |
| 3162-Col3-<br>4/20    | <0.001 | *** |
| 3162-<br>CLT1.18      | <0.001 | *** |
| 3162-CLT1.2           | 1.0000 | NS  |
| CLT4.7-<br>CLT5.17    | 0.0514 | NS  |
| CLT4.7-Col3-<br>4/20  | 1.0000 | NS  |
| CLT4.7-<br>CLT1.18    | 0.5366 | NS  |
| CLT4.7-<br>CLT1.2     | <0.001 | *** |
| CLT5.17-<br>COL3-4/20 | 0.0616 | NS  |
| CLT5.17-<br>CLT1.18   | <0.001 | *** |
| CLT5.17-<br>CLT1.2    | <0.001 | *** |
| COL3-4/20-<br>CTL1.18 | 0.4962 | NS  |
| COL3-4/20-<br>CTL1.2  | <0.001 | *** |
| CTL1.18-<br>CTL1.2    | <0.001 | *** |

**Table S19: Age-wise male and female mean ratio comparisons**

| Age                                     | Mean    | SEM          |
|-----------------------------------------|---------|--------------|
| 40                                      | 2.10125 | 0.835728     |
| 45                                      | 2.21    | 0.856371     |
| 50                                      | 2.2     | 0.762234     |
| 55                                      | 1.98875 | 0.723196     |
| Comparison between different age groups |         |              |
| Age groups                              | P Value | Significance |
| 40-45                                   | 0.993   | NS           |
| 40-50                                   | 0.995   | NS           |
| 40-55                                   | 0.992   | NS           |
| 45-50                                   | 1.000   | NS           |
| 45-55                                   | 0.945   | NS           |
| 50-55                                   | 0.952   | NS           |

**Table S20: Structural features of the eight intervals used in this study**

| Line Name                                 | Chr. No | Centromere position (Mb) | Percentage of interval that is close to a telomere* | Percentage of interval that is close to a centromere** | Length of interval (distance between markers , Mb) | Interval's length as % of total |
|-------------------------------------------|---------|--------------------------|-----------------------------------------------------|--------------------------------------------------------|----------------------------------------------------|---------------------------------|
| CTL1.2<br>(Centromere is between markers) | 1       | 15.05                    | 0                                                   | 65                                                     | 10.50                                              | 34%                             |
| CTL1.18                                   | 1       | 15.05                    | 100                                                 | 0                                                      | 3.81                                               | 13%                             |
| CTL2.4                                    | 2       | 3.9                      | 0                                                   | 0                                                      | 3.3                                                | 17%                             |
| Col3-4/20                                 | 3       | 13.8                     | 65                                                  | 0                                                      | 5.04                                               | 21%                             |
| 3158                                      | 3       | 13.8                     | 65                                                  | 0                                                      | 5.54                                               | 23%                             |

|         |   |       |    |    |     |     |
|---------|---|-------|----|----|-----|-----|
| CTL4.7  | 4 | 6     | 43 | 0  | 5.4 | 28% |
| 3162    | 5 | 11.88 | 0  | 22 | 4.8 | 17% |
| CTL5.17 | 5 | 11.88 | 72 | 0  | 5.1 | 18% |

The table summarises some key features of the intervals bounded by each pair of markers. \*This percentage was calculated by determining how much of the interval's length occurs within the first 15% or last 15% of the chromosome's length. \*\*This percentage was calculated by determining how much of the interval's length occurred in the two regions that are on either side of the centromere (each region being 15% of the chromosome's length). For both cases, the choice of 15% was based on our analysis of the distribution of male and female CO hotspots in each of the five chromosomes, as depicted in Figure 4, Giraut *et al.* (2011).
